# Supplementary material
Source: PubMed Central journal article supplement (PMC3321583)

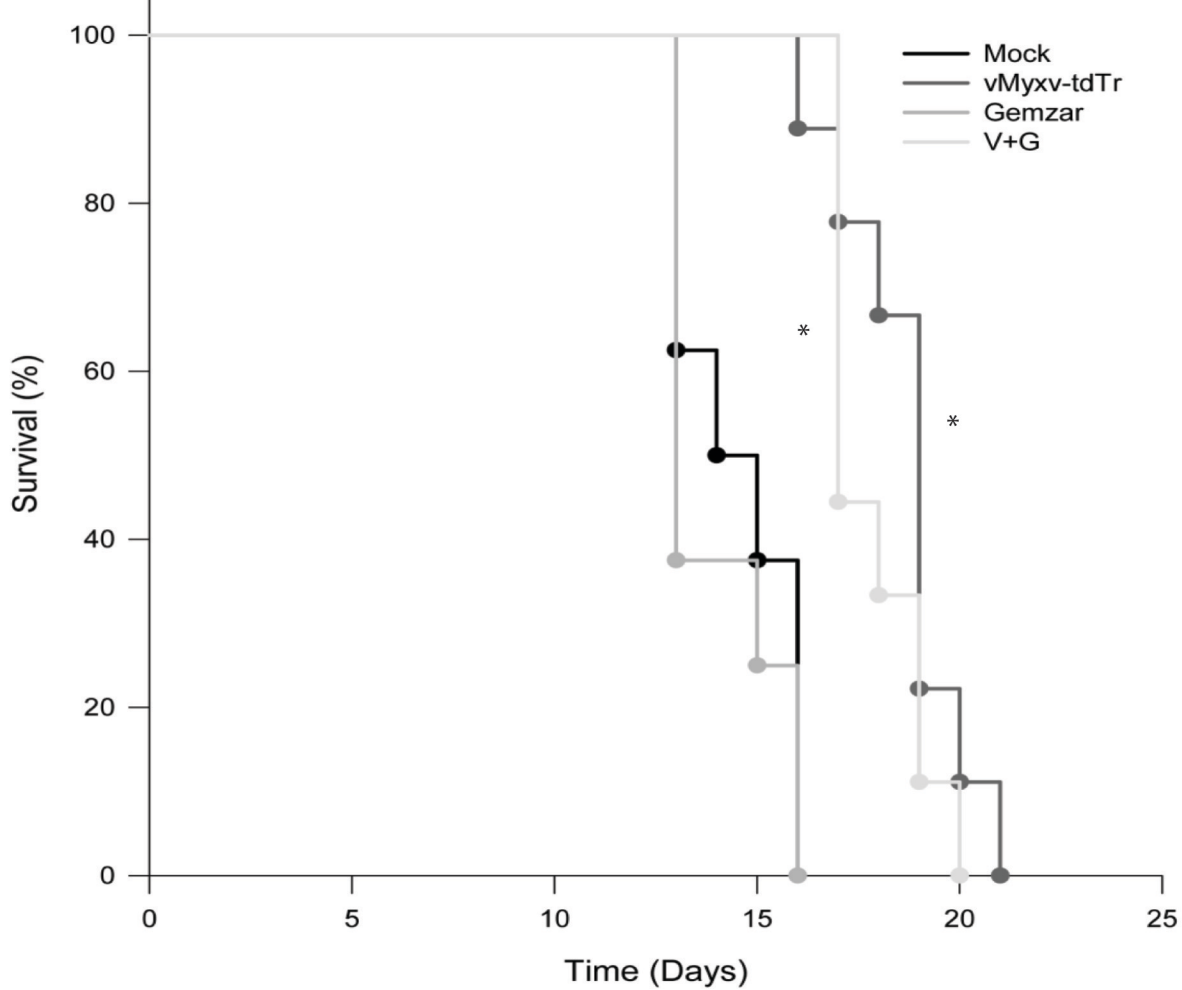

Supplement: mt2011293x1.pdf [file mt2011293x1.pdf]
